# Supplementary material for: Body Mass Index, Waist Circumference, Diabetes, and Risk of Liver Cancer for U.S. Adults
Source: Oxford University Press journal article supplement (doi:10.1158/0008-5472.can-16-0787), 2016-10-13
Supplement: 00085472can160787-sup-163515_1_supp_3554876_698ry8.docx [file 00085472can160787-sup-163515_1_supp_3554876_698ry8.docx]

Title to Supplemental Figure 1:

Supplementary Figure 1. Individual participant meta-analysis of body mass index (per 5 kg/m2) and liver cancer risk in the Liver Cancer Pooling Project

Footnote to Supplementary Figure 1.

Multivariable models include age, sex, study, alcohol, smoking, and race.

Title to Supplemental Figure 2:

Supplementary Figure 2. Individual participant meta-analysis of waist circumference (per 5 cm) and liver cancer risk in the Liver Cancer Pooling Project

Footnote to Supplementary Figure 2.

Multivariable models include age, sex, study, alcohol, smoking, race and body mass index.

Title to Supplemental Figure 3:

Supplementary Figure 3. Individual participant meta-analysis of diabetes (yes versus no) and liver cancer risk in the Liver Cancer Pooling Project

Footnote to Supplementary Figure 3.

Multivariable models include age, sex, study, alcohol, smoking, race and body mass index.
