# Supplementary figures and images for: Body Mass Index, Waist Circumference, Diabetes, and Risk of Liver Cancer for U.S. Adults
Source: Oxford University Press journal article supplement (doi:10.1158/0008-5472.can-16-0787), 2016-10-13

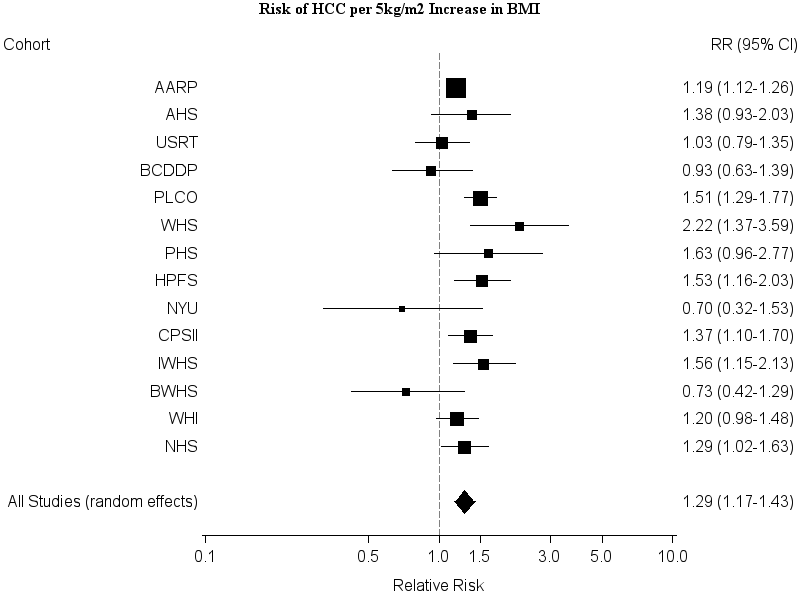


Figure 1

Supplement: 00085472can160787-sup-163515_1_supp_3554877_z98rz2.docx [file 00085472can160787-sup-163515_1_supp_3554877_z98rz2.docx]

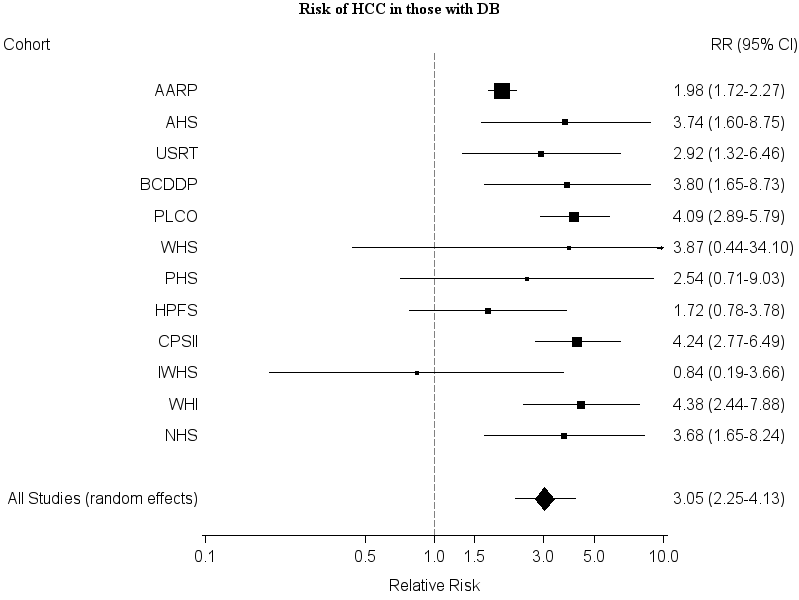


Figure 3

Supplement: 00085472can160787-sup-163515_1_supp_3554881_598s1f.docx [file 00085472can160787-sup-163515_1_supp_3554881_598s1f.docx]
